# Supplementary material for: Species-Specific Responses of Insectivorous Bats to Weather Conditions in Central Chile
Source: MDPI journal article supplement (doi:10.3390/ani14060860), 2024-03-11
Supplement: s1 [file s1]

## Appendix A. Supplementary Material

### Supplementary Tables

Table S1. Summary of GAMM model selection statistic for evaluating the influence of weather conditions on the onset and end time of bat activity and relative abundance in a Mediterranean agricultural landscape in central Chile. The first model listed at each species is the minimum AIC model. Only models with a  $\Delta_i$  of 2 or less are included as competing models. df: degrees of freedom; AIC: Akaike information criteria;  $\Delta_i$ : differences in AIC with respect to the top-ranked model;  $W_i$ : Akaike weight Relative probability of each model being the best model). *TeSu* = Temperature before sunset; *HuSu* = Relative humidity before sunset; *TeNo* = Overnight temperature; *HuNo* = Overnight relative humidity; *Onset* = Onset time of activity of the species.

| Response variable | Species /best-fitted models                     | df    | AIC     | $\Delta_i$ | $W_i$ |
|-------------------|-------------------------------------------------|-------|---------|------------|-------|
| Onset time        | <i>Tadarida brasiliensis</i>                    |       |         |            |       |
|                   | s(HuSu) <sup>***</sup> + s(TeSu) <sup>***</sup> | 5.28  | 1294.68 | 0.00       | 0.53  |
|                   | s(HuSu) <sup>***</sup>                          | 10.74 | 1294.95 | 0.27       | 0.47  |
|                   | <i>Myotis arescens</i>                          |       |         |            |       |
|                   | s(TeSu)                                         | 3.01  | 1008.56 | 0.00       | 0.45  |
|                   | s(HuSu)                                         | 3.00  | 1008.93 | 0.37       | 0.38  |

| Response variable | Species /best-fitted models      | df    | AIC     | $\Delta_i$ | $W_i$ |
|-------------------|----------------------------------|-------|---------|------------|-------|
|                   | s(HuSu) + s(TeSu)                | 4.00  | 1010.48 | 1.92       | 0.17  |
|                   | <i>Lasiurus varius</i>           |       |         |            |       |
|                   | s(HuSu) + s(TeSu)**              | 4.00  | 1160.26 | 0.00       | 0.56  |
|                   | s(TeSu)**                        | 3.00  | 1160.78 | 0.52       | 0.43  |
|                   | <i>Lasiurus villosissimus</i>    |       |         |            |       |
|                   | s(HuSu)*                         | 5.77  | 1135.60 | 0.00       | 0.62  |
|                   | s(HuSu) + s(TeSu)                | 6.73  | 1137.55 | 1.95       | 0.23  |
|                   | <i>Histiotus montanus</i>        |       |         |            |       |
|                   | s(HuSu)* + s(TeSu)***            | 10.90 | 1011.97 | 0.00       | 0.73  |
| End time          | <i>Tadarida brasiliensis</i>     |       |         |            |       |
|                   | s(Onset) + s(HuNo)* + s(TeNo)*** | 8.25  | 1528.70 | 0.00       | 0.71  |
|                   | s(HuNo)*** + s(TeNo)***          | 5.06  | 1530.49 | 1.79       | 0.29  |
|                   | <i>Myotis arescens</i>           |       |         |            |       |
|                   | s(Onset)* + s(HuNo)              | 6.76  | 1092.99 | 0.00       | 0.43  |

| Response variable | Species /best-fitted models                               | df   | AIC     | $\Delta_i$ | $W_i$ |
|-------------------|-----------------------------------------------------------|------|---------|------------|-------|
|                   | s(Onset) <sup>*</sup> + s(HuNo) + s(TeNo)                 | 7.61 | 1094.82 | 1.83       | 0.17  |
|                   | s(Onset) <sup>*</sup> + s(TeNo)                           | 6.42 | 1094.85 | 1.87       | 0.17  |
|                   | <i>Lasiurus varius</i>                                    |      |         |            |       |
|                   | s(Onset) <sup>***</sup> + s(HuNo)                         | 4.70 | 1353.57 | 0.00       | 0.35  |
|                   | s(Onset) <sup>***</sup>                                   | 3.51 | 1353.95 | 0.38       | 0.29  |
|                   | s(Onset) <sup>***</sup> + s(TeNo)                         | 4.00 | 1354.45 | 0.87       | 0.23  |
|                   | s(Onset) <sup>***</sup> + s(HuNo) + s(TeNo)               | 5.88 | 1355.54 | 1.97       | 0.13  |
|                   | <i>Lasiurus villosissimus</i>                             |      |         |            |       |
|                   | s(Onset) <sup>***</sup> + s(HuNo) <sup>***</sup>          | 6.43 | 1380.45 | 0.00       | 0.69  |
|                   | s(Onset) <sup>***</sup> + s(HuNo) <sup>**</sup> + s(TeNo) | 7.42 | 1382.24 | 1.79       | 0.28  |
|                   | <i>Histiotus montanus</i>                                 |      |         |            |       |
|                   | s(Onset) <sup>***</sup> + s(HuNo) <sup>**</sup>           | 4.96 | 1116.85 | 0.00       | 0.47  |
|                   | s(Onset) <sup>***</sup> + s(HuNo) + s(TeNo)               | 5.65 | 1117.50 | 0.66       | 0.34  |
|                   | s(Onset) <sup>***</sup> + s(TeNo) <sup>*</sup>            | 4.75 | 1118.71 | 1.87       | 0.18  |

| Response variable | Species /best-fitted models   | df    | AIC     | $\Delta_i$ | $W_i$ |
|-------------------|-------------------------------|-------|---------|------------|-------|
| Activity index    | <i>Tadarida brasiliensis</i>  |       |         |            |       |
|                   | s(HuNo)*** + s(TeNo)***       | 4.00  | 1311.76 | 0.00       | 1.00  |
|                   | <i>Myotis arescens</i>        |       |         |            |       |
|                   | s(HuNo)*** + s(TeNo)          | 12.40 | 641.02  | 0.00       | 0.99  |
|                   | <i>Lasiurus varius</i>        |       |         |            |       |
|                   | s(HuNo)*** + s(TeNo)          | 6.18  | 636.81  | 0.00       | 0.66  |
|                   | s(HuNo)***                    | 4.73  | 638.12  | 1.31       | 0.34  |
|                   | <i>Lasiurus villosissimus</i> |       |         |            |       |
|                   | s(HuNo)*** + s(TeNo)*         | 12.29 | 715.24  | 0.00       | 0.93  |
|                   | <i>Histiotus montanus</i>     |       |         |            |       |
|                   | s(HuNo)***                    | 4.25  | 516.06  | 0.00       | 0.64  |
|                   | s(HuNo)* + s(TeNo)            | 7.98  | 517.35  | 0.52       | 0.33  |
